# Supplementary material for: High Atmospheric CO2 Concentration Mitigates Drought Effects on Acanthostyles buniifolius an Important Grassland Weed in South America
Source: MDPI journal article supplement (doi:10.3390/plants11172270), 2022-08-31
Supplement: s1 [file s1]

## Supplementary Material

Table S1 Vegetative stage

| Vegetative stage        |                     |                     |                |         |                                      |                                      |                                   |                                   |         |             |
|-------------------------|---------------------|---------------------|----------------|---------|--------------------------------------|--------------------------------------|-----------------------------------|-----------------------------------|---------|-------------|
| Variable                | e[CO <sub>2</sub> ] | a[CO <sub>2</sub> ] | Drought stress | Control | e[CO <sub>2</sub> ] + drought stress | a[CO <sub>2</sub> ] + drought stress | e[CO <sub>2</sub> ] + rehydration | a[CO <sub>2</sub> ] + rehydration | Control | Rehydration |
| Water potential pre daw |                     |                     |                |         | ↑                                    | ↓                                    |                                   |                                   | ≈       | ≈           |
| Water potential midday  |                     |                     | ↑              | ↓       |                                      |                                      |                                   |                                   | ≈       | ≈           |
| Relative water content  |                     |                     | ↓              | ↑       |                                      |                                      |                                   |                                   | ≈       | ≈           |
| Proline                 |                     |                     |                |         | ↑                                    | ↓                                    | ↑                                 | ↓                                 |         |             |
| Glycine betaine         |                     |                     |                |         | ↑                                    | ↓                                    | ≈                                 | ≈                                 |         |             |
| Soluble sugar           |                     |                     |                |         | ≈                                    | ≈                                    | ↑                                 | ↓                                 |         |             |
| APX activity            | ↑                   | ↓                   |                |         |                                      |                                      | ↑                                 | ↓                                 |         |             |
| SOD activity            | ↑                   | ↓                   |                |         |                                      |                                      | ↑                                 | ↓                                 |         |             |
| Hydrogen peroxide       |                     |                     | ↑              | ↓       |                                      |                                      |                                   |                                   | ≈       | ≈           |
| Lipid peroxidation      |                     |                     | ↑              | ↓       |                                      |                                      |                                   |                                   | ↑       | ↓           |
| Carotenoids             |                     |                     |                |         | ↓                                    | ↑                                    |                                   |                                   | ≈       | ≈           |
| Chlorophyll A           |                     |                     | ↑              | ↓       |                                      |                                      |                                   |                                   | ≈       | ≈           |
| Chlorophyll B           |                     |                     |                |         |                                      |                                      | ≈                                 | ≈                                 |         |             |
| Root dry mass           |                     |                     |                |         | ↑                                    | ↓                                    |                                   |                                   | ≈       | ≈           |

Qualitative table to demonstrate how the trends of the results expressed in the figures. The arrows indicate ↑ (increase), ↓ (decrease) and ≈ (similarity) when compared: *e*[CO<sub>2</sub>] X *a*[CO<sub>2</sub>]; Drought stress X Control; *e*[CO<sub>2</sub>] + drought stress X *a*[CO<sub>2</sub>] + drought stress; *e*[CO<sub>2</sub>] + rehydration X *a*[CO<sub>2</sub>] + rehydration e Control X Rehydration

Table S2 Reproductive stage

| Variable                | Reproductive stage |                  |                |         |                                   |                                   |                                |                                |         |             |
|-------------------------|--------------------|------------------|----------------|---------|-----------------------------------|-----------------------------------|--------------------------------|--------------------------------|---------|-------------|
|                         | $e[\text{CO}_2]$   | $a[\text{CO}_2]$ | Drought stress | Control | $e[\text{CO}_2]$ + drought stress | $a[\text{CO}_2]$ + drought stress | $e[\text{CO}_2]$ + rehydration | $a[\text{CO}_2]$ + rehydration | Control | Rehydration |
| Water potential pre daw |                    |                  | ↑              | ↓       |                                   |                                   |                                |                                | ↓       | ↑           |
| Water potential midday  |                    |                  | ↑              | ↓       |                                   |                                   |                                |                                | ↓       | ↑           |
| Relative water content  |                    |                  |                |         | ↑                                 | ↓                                 |                                |                                | ↑       | ↓           |
| Proline                 |                    |                  | ↑              | ↓       |                                   |                                   |                                |                                | ↓       | ↑           |
| Glycine betaine         |                    |                  | ↑              | ↓       |                                   |                                   |                                |                                | ↓       | ↑           |
| Soluble sugar           |                    |                  | ↑              | ↓       |                                   |                                   | ≈                              | ≈                              |         |             |
| APX activity            |                    |                  |                |         | ↓                                 | ↑                                 | ≈                              | ≈                              |         |             |
| SOD activity            |                    |                  |                |         | ≈                                 | ≈                                 | ≈                              | ≈                              |         |             |
| Hydrogen peroxide       |                    |                  |                |         | ↓                                 | ↑                                 | ≈                              | ≈                              |         |             |
| Lipid peroxidation      | ↑                  | ↓                |                |         |                                   |                                   | ↑                              | ↓                              |         |             |
| Carotenoids             |                    |                  |                |         | ↑                                 | ↓                                 | ≈                              | ≈                              |         |             |
| Chlorophyll A           |                    |                  | ↑              | ↓       |                                   |                                   | ≈                              | ≈                              |         |             |
| Chlorophyll B           |                    |                  | ↑              | ↓       |                                   |                                   | ≈                              | ≈                              |         |             |
| Root dry mass           |                    |                  |                |         | ↑                                 | ↓                                 | ↑                              | ↓                              |         |             |

Qualitative table to demonstrate how the trends of the results expressed in the figures. The arrows indicate ↑ (increase), ↓ (decrease) and ≈ (similarity) when compared:  $e[\text{CO}_2]$  X  $a[\text{CO}_2]$ ; Drought stress X Control;  $e[\text{CO}_2]$  + drought stress X  $a[\text{CO}_2]$  + drought stress;  $e[\text{CO}_2]$  + rehydration X  $a[\text{CO}_2]$  + rehydration e Control X Rehydration
